# Supplementary material
Source: publisher site journal article supplement (https://www.dovepress.com/article/572998)
Supplement: Supplementary file 1 [file 572998%20Supplementary%20Material.docx]

**Table S1. I CURB COPD Program Topics**

| **Session** | **Topic** |
| --- | --- |
| 1 | Overview of COPD |
| 2 | Smoking Cessation and the Effects of Smoking that Relate to COPD |
| 3 | COPD Medication and Treatments |
| 4 | Pulmonary Rehabilitation |
| 5 | Nutrition in COPD |
| 6 | Recap of Sessions and COPD Awareness Month |
| 7 | COPD and Self-management Behaviors |
| 8 | COPD Medications, Treatment, and Inhaler Technique |
